# Supplementary material
Source: PubMed Central journal article supplement (PMC4538554)
Supplement: AAC.00542-15_zac009154304so1.pdf [file AAC.00542-15_zac009154304so1.pdf]

## Supplementary Table 1.

### Strain List

| species                      | strain          | Genotype                     | Source        |
|------------------------------|-----------------|------------------------------|---------------|
| <i>Neurospora crassa</i>     | NcW#1           | $\Delta His-3; \Delta ads-4$ | this study    |
|                              | NcW#2           | $\Delta ads-4; ads-4$        | this study    |
|                              | <i>ads-4</i> OE | OE:: <i>ads-4</i>            | this study    |
|                              | WT              | wild type                    | FGSC          |
|                              | FGSC #11386     | $\Delta ads-4$               | FGSC          |
|                              | FGSC #12544     | $\Delta Ncmmt-2$             | FGSC          |
|                              | FGSC #13802     | $\Delta erg5$                | FGSC          |
|                              | FGSC #21286     | $\Delta NcabcB$              | FGSC          |
|                              | FGSC #11238     | $\Delta cdr4$                | FGSC          |
|                              | FGSC #13302     | $\Delta Ncmnn4$              | FGSC          |
| FGSC #13399                  | $\Delta Ncrta2$ | FGSC                         |               |
| <i>Aspergillus fumigatus</i> | YJ407           | wild type                    | Jin cheng lab |
|                              | CEA17           | $\Delta pyrG89$              | Jin cheng lab |
|                              | Afu1g16460      | $\Delta Afads4$              | this study    |



**Supplementary Fig. 1** Sequence alignment of ADS-4 homologs. Sequence alignment was performed using clustalx 1.83 and conserved amino acids were shaded. FOXG\_11153, FVEG\_09636, FGSG\_01555, MGG\_03288, Afulg16460, and ANID\_11891 were homologs of ADS-4 in *Fusarium oxysporum*, *Fusarium verticilloides*, *Fusarium graminearum*, *Magnaporthe oryzae*, *Aspergillus fumigatus*, and *Aspergillus nidulans*, respectively.

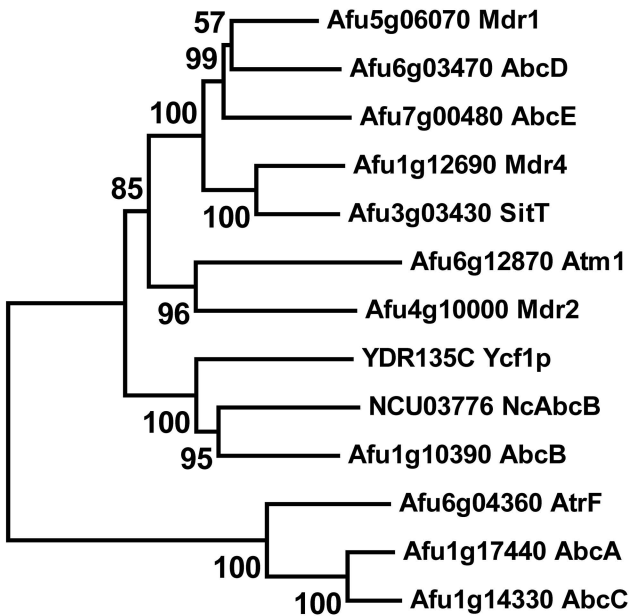

0.2

**Supplementary Fig. 2** Phylogenetic analysis of NcAbcB and its homologs in *Aspergillus fumigatus* and *Saccharomyces cerevisiae*. The neighbor-joining tree was constructed using MEGA version 6 with cut-off bootstrap values of 50% obtained from 1000 replicates (NCU=*Neurospora crassa*, Afu=*Aspergillus fumigatus*, YDR=*Saccharomyces cerevisiae*).
